# Supplementary material
Source: PubMed Central journal article supplement (PMC5807932)

Figure S1 : Ferraris et al., 2015

PHH4 PHH7  
C/C T/T

IFNAR1

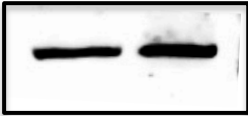

IL10R $\beta$

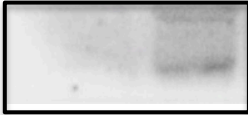

IL28R $\alpha$

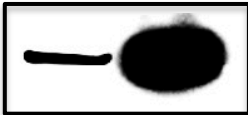

Mxa

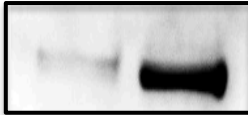

OAS1

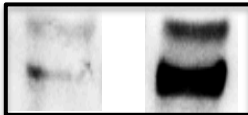

p-PKR

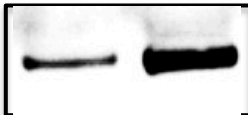

PKR

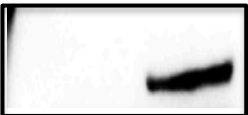

p-eIF2 $\alpha$

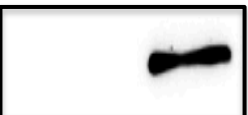

Supplement: mmc1.pdf [file mmc1.pdf]

Figure S2 : Ferraris et al., 2015

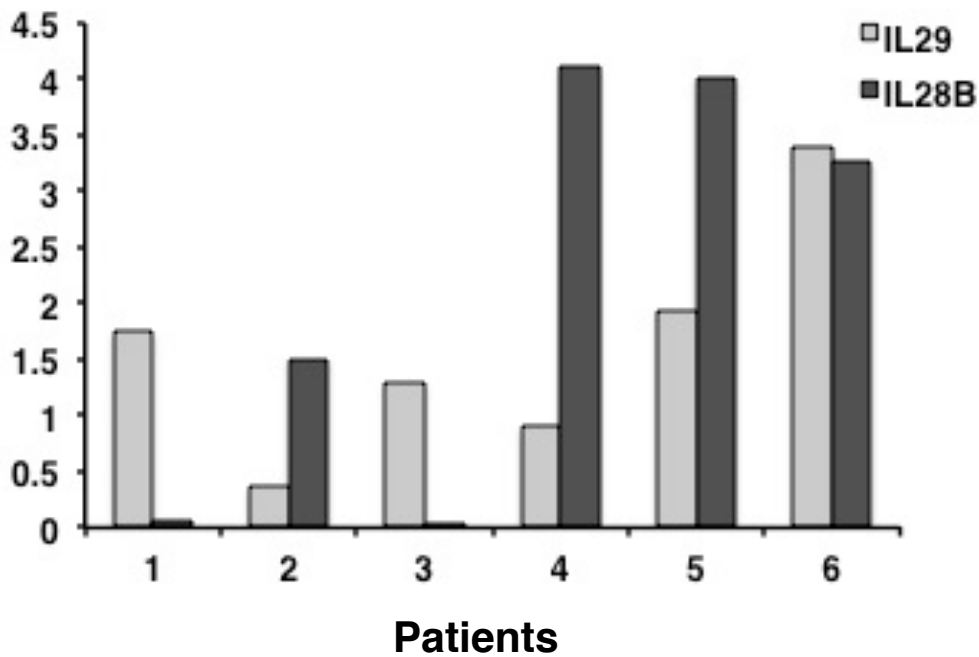

Supplement: mmc2.pdf [file mmc2.pdf]

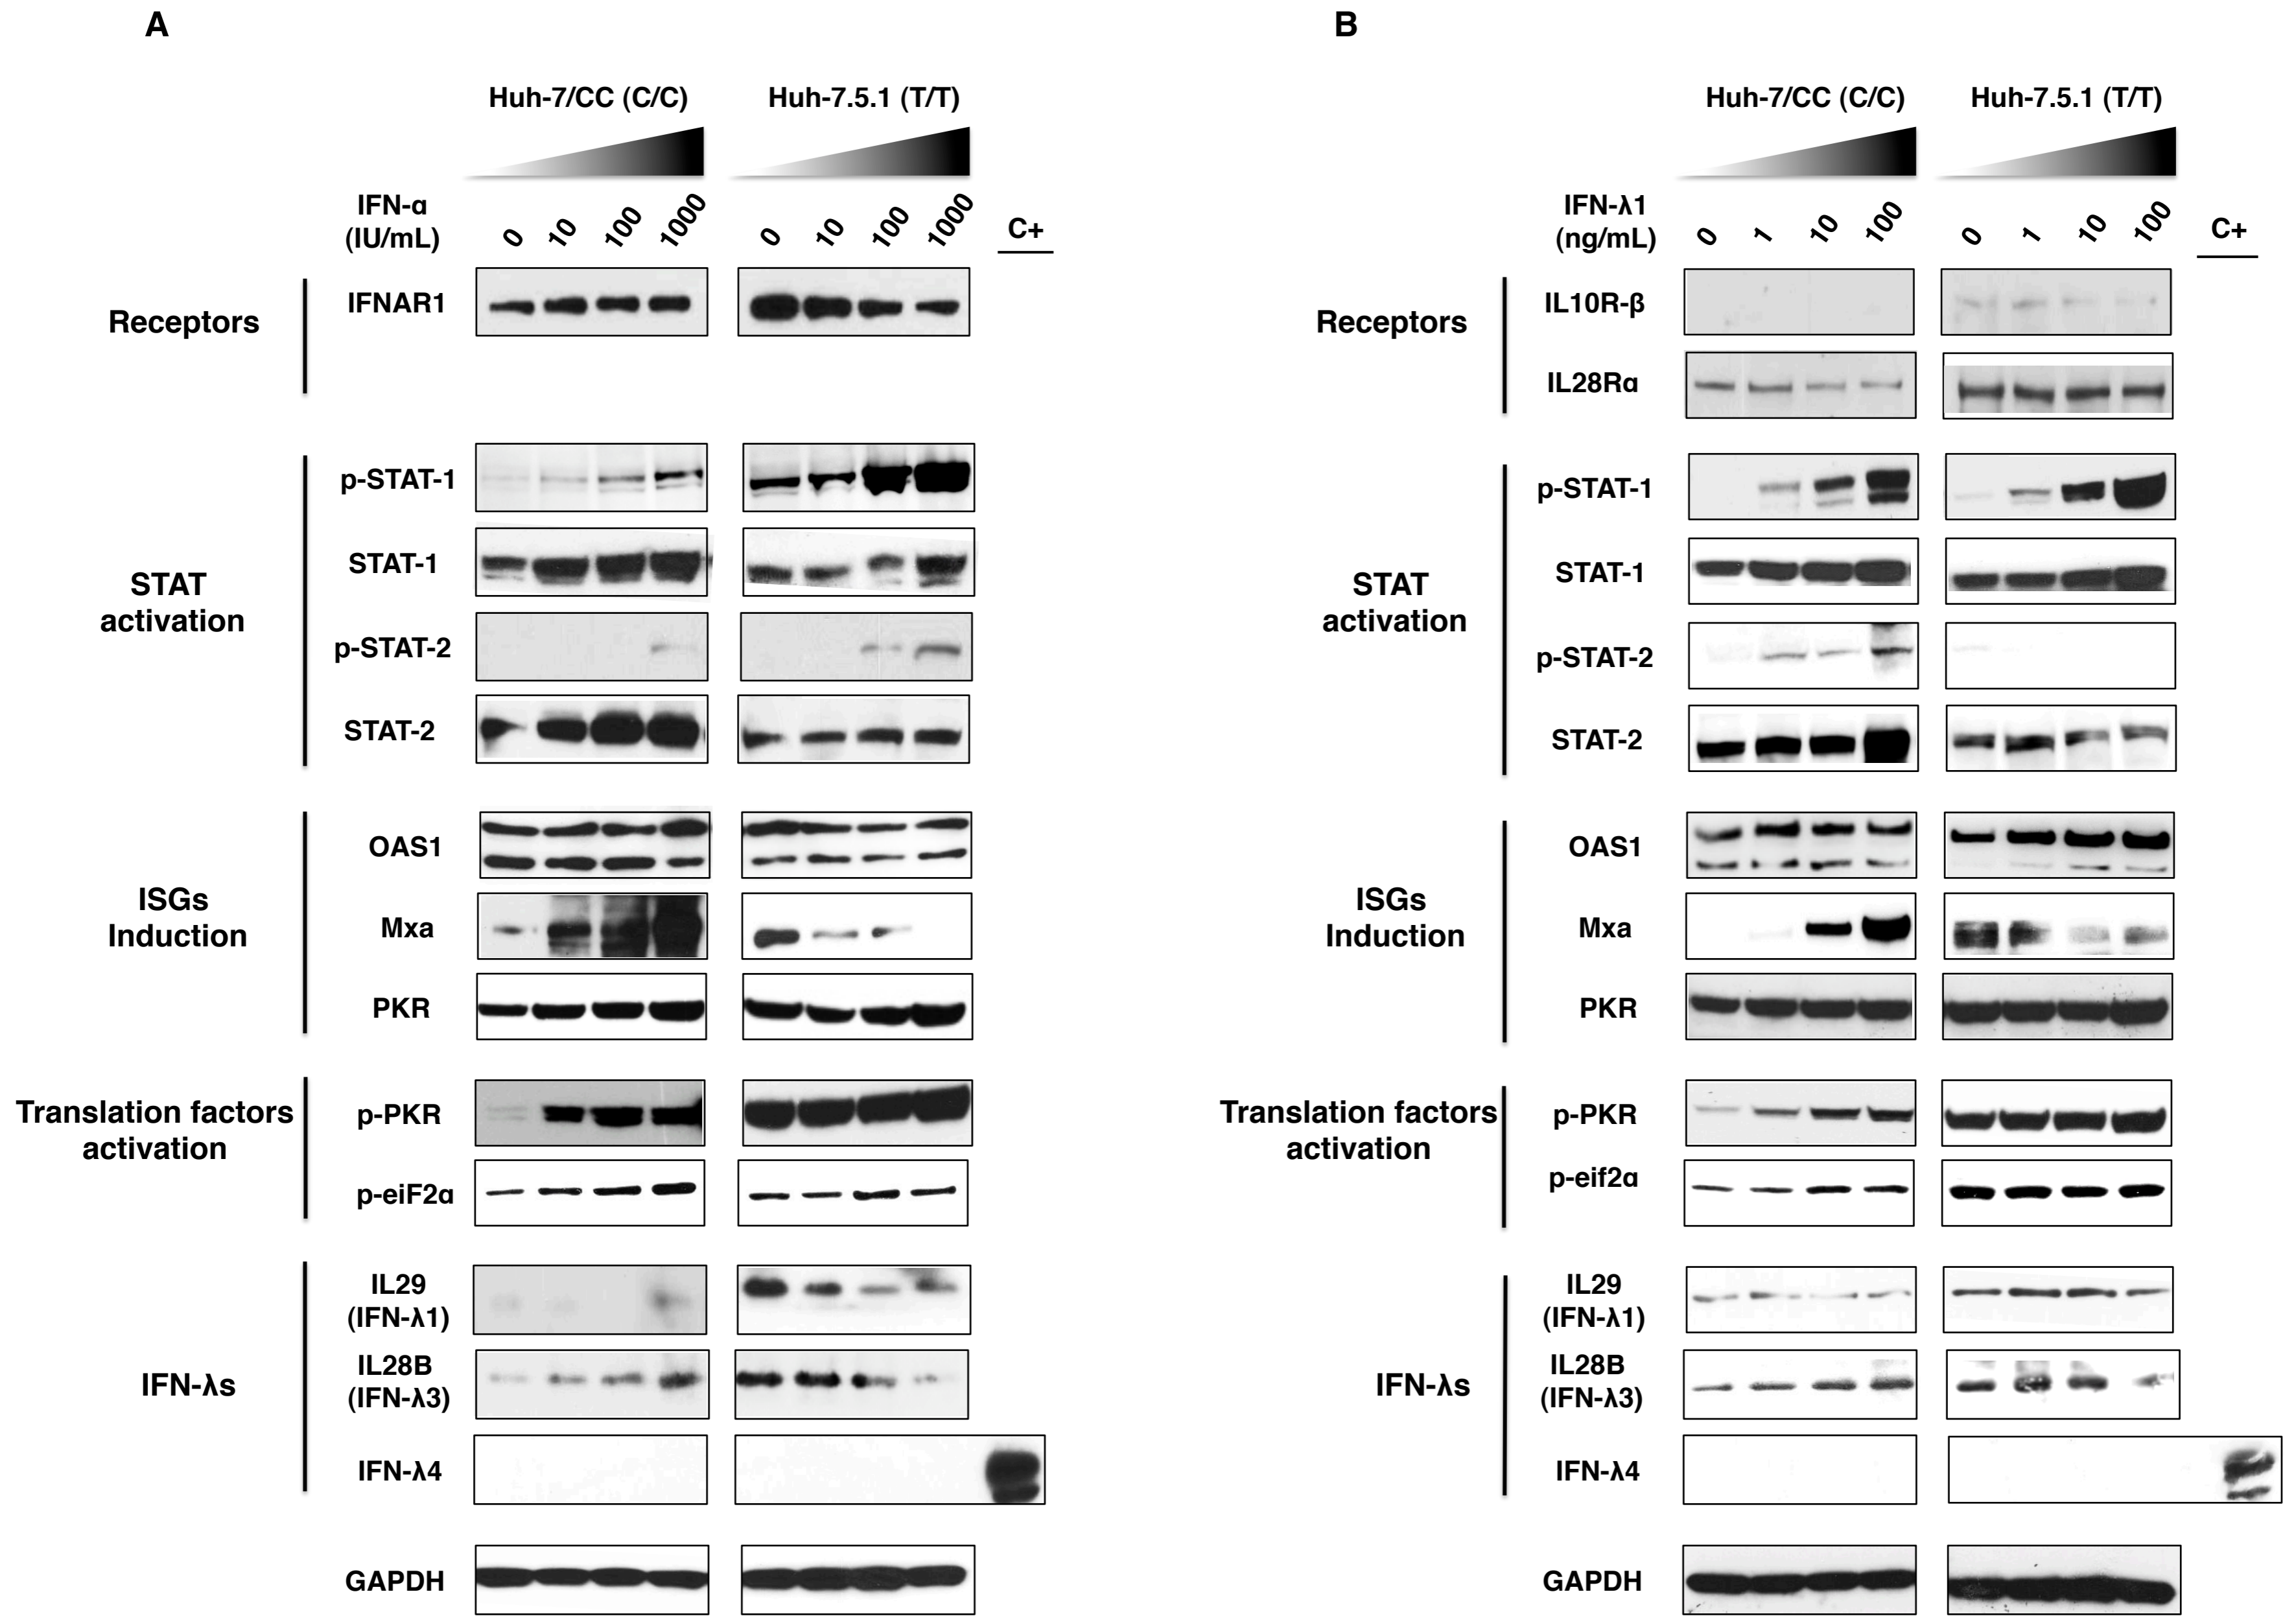

Supplement: mmc3.pdf [file mmc3.pdf]

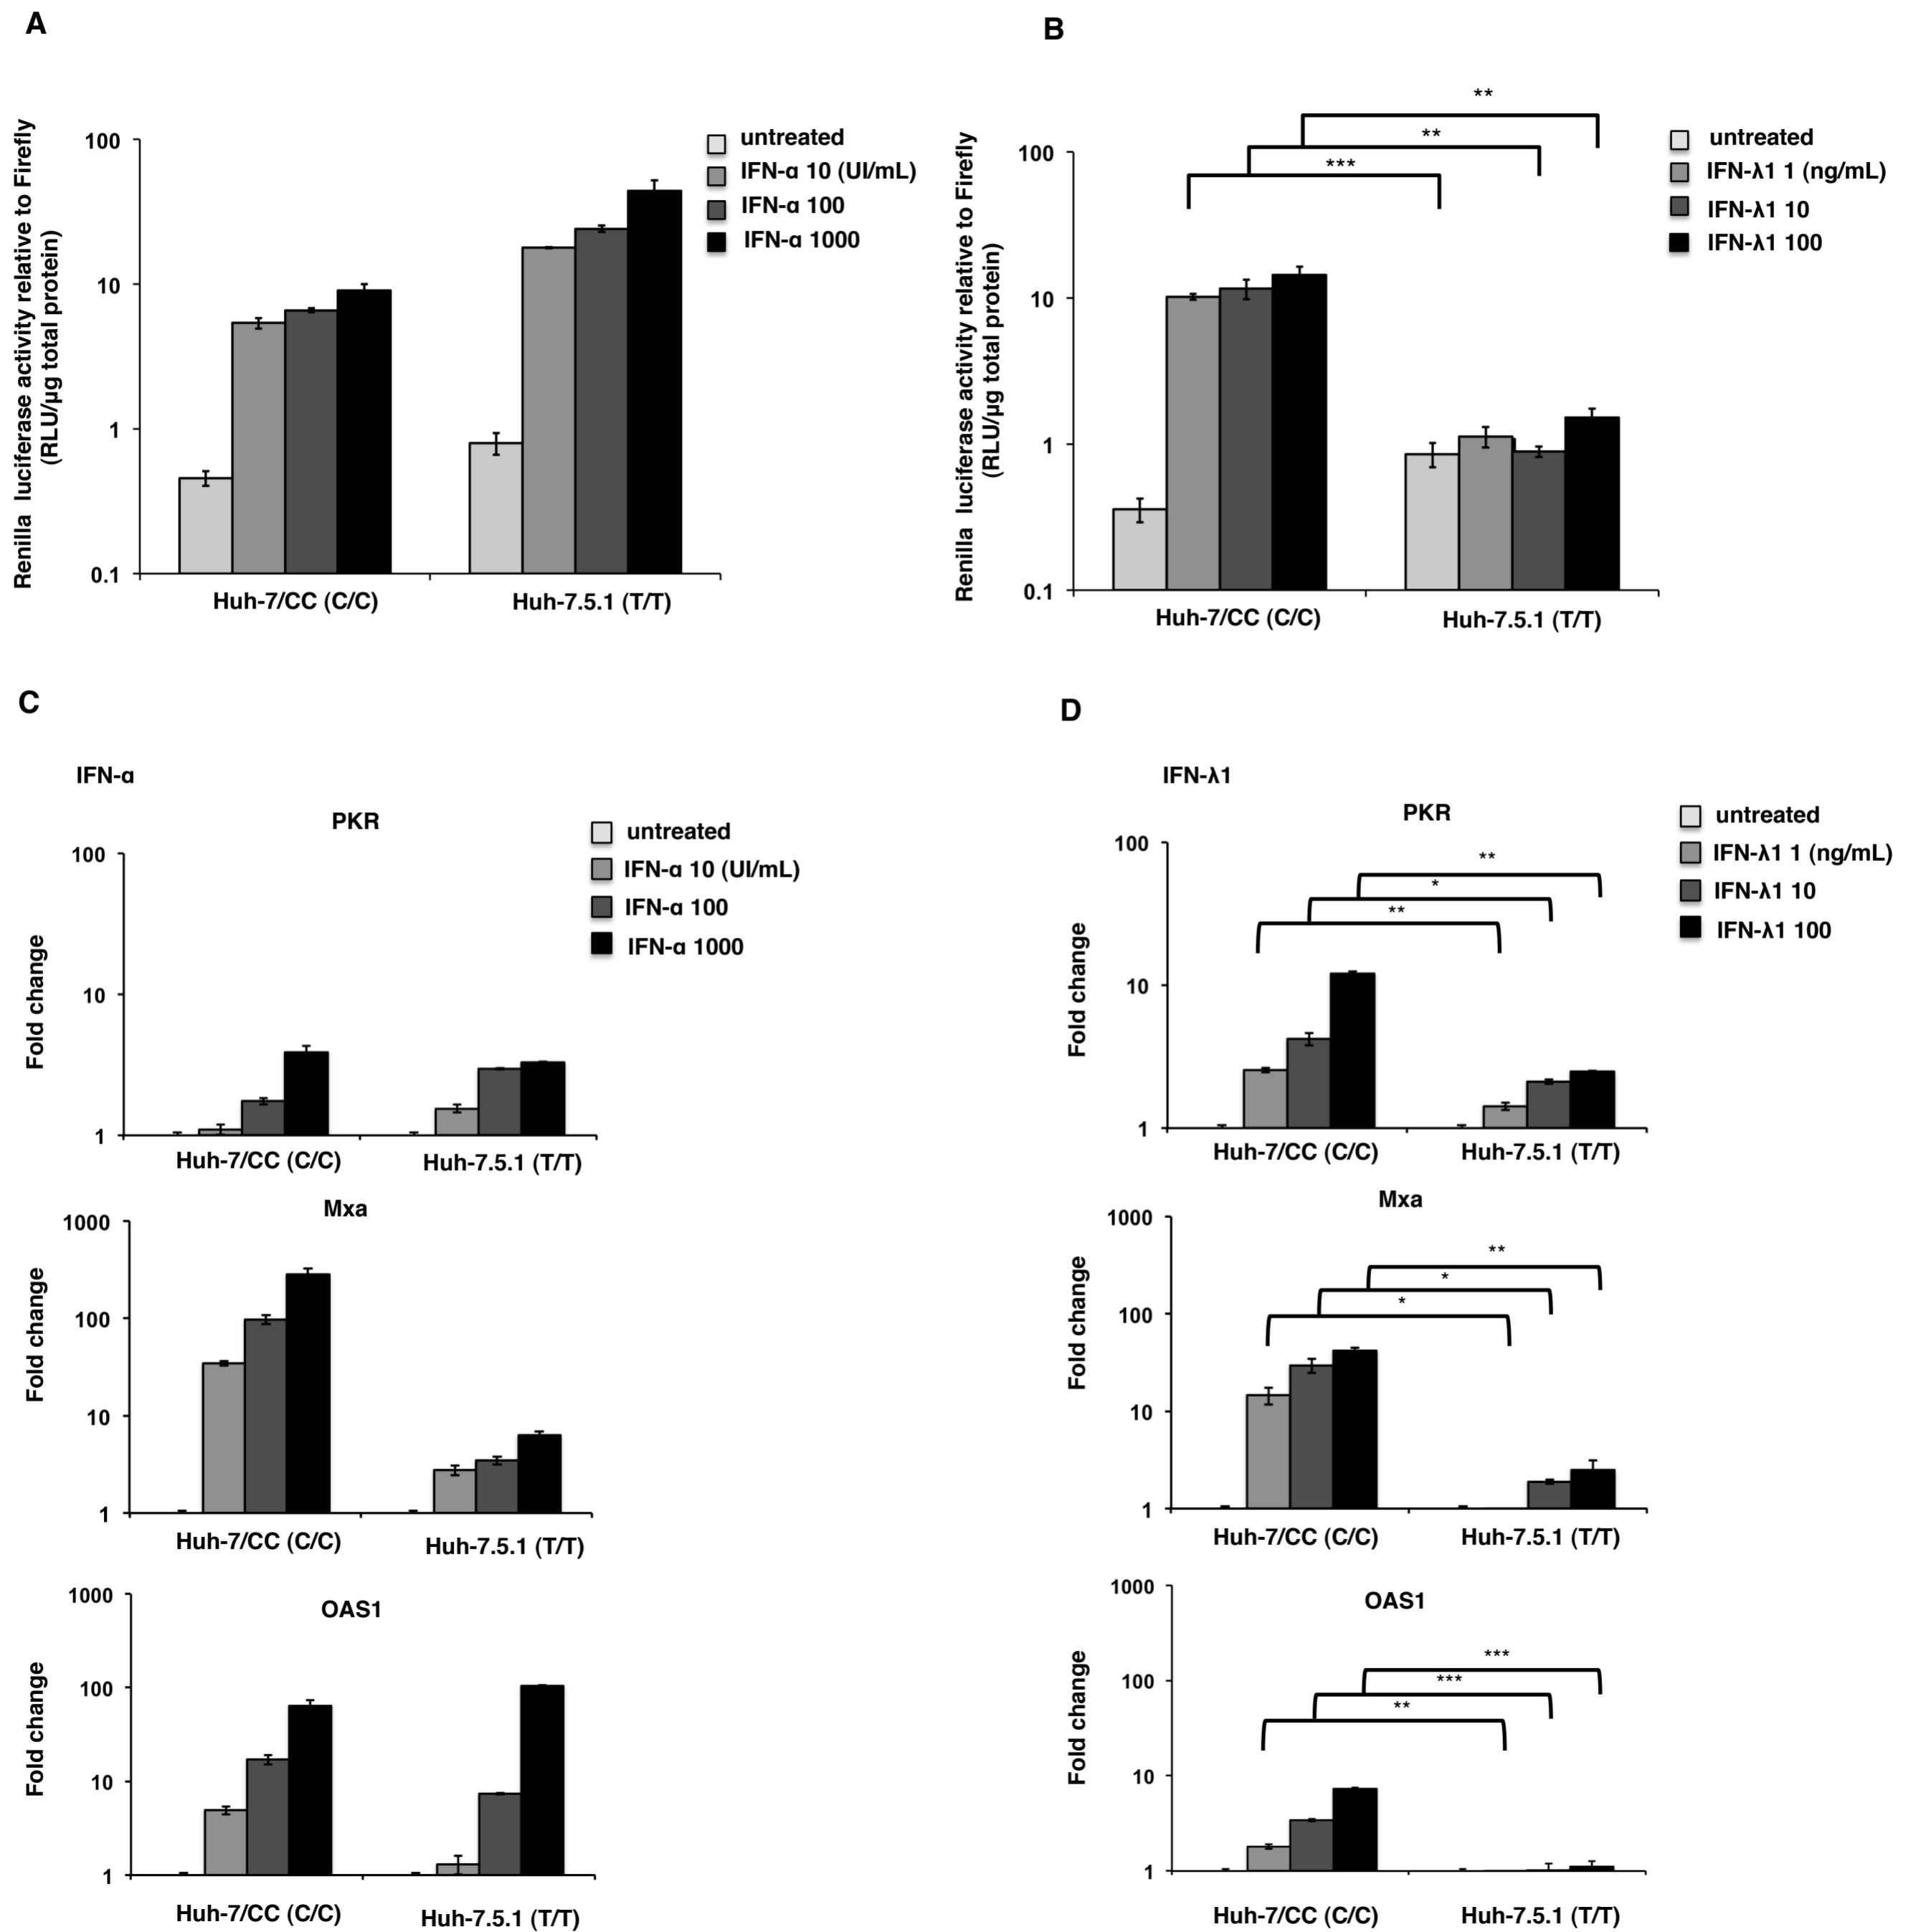

Supplement: mmc4.pdf [file mmc4.pdf]

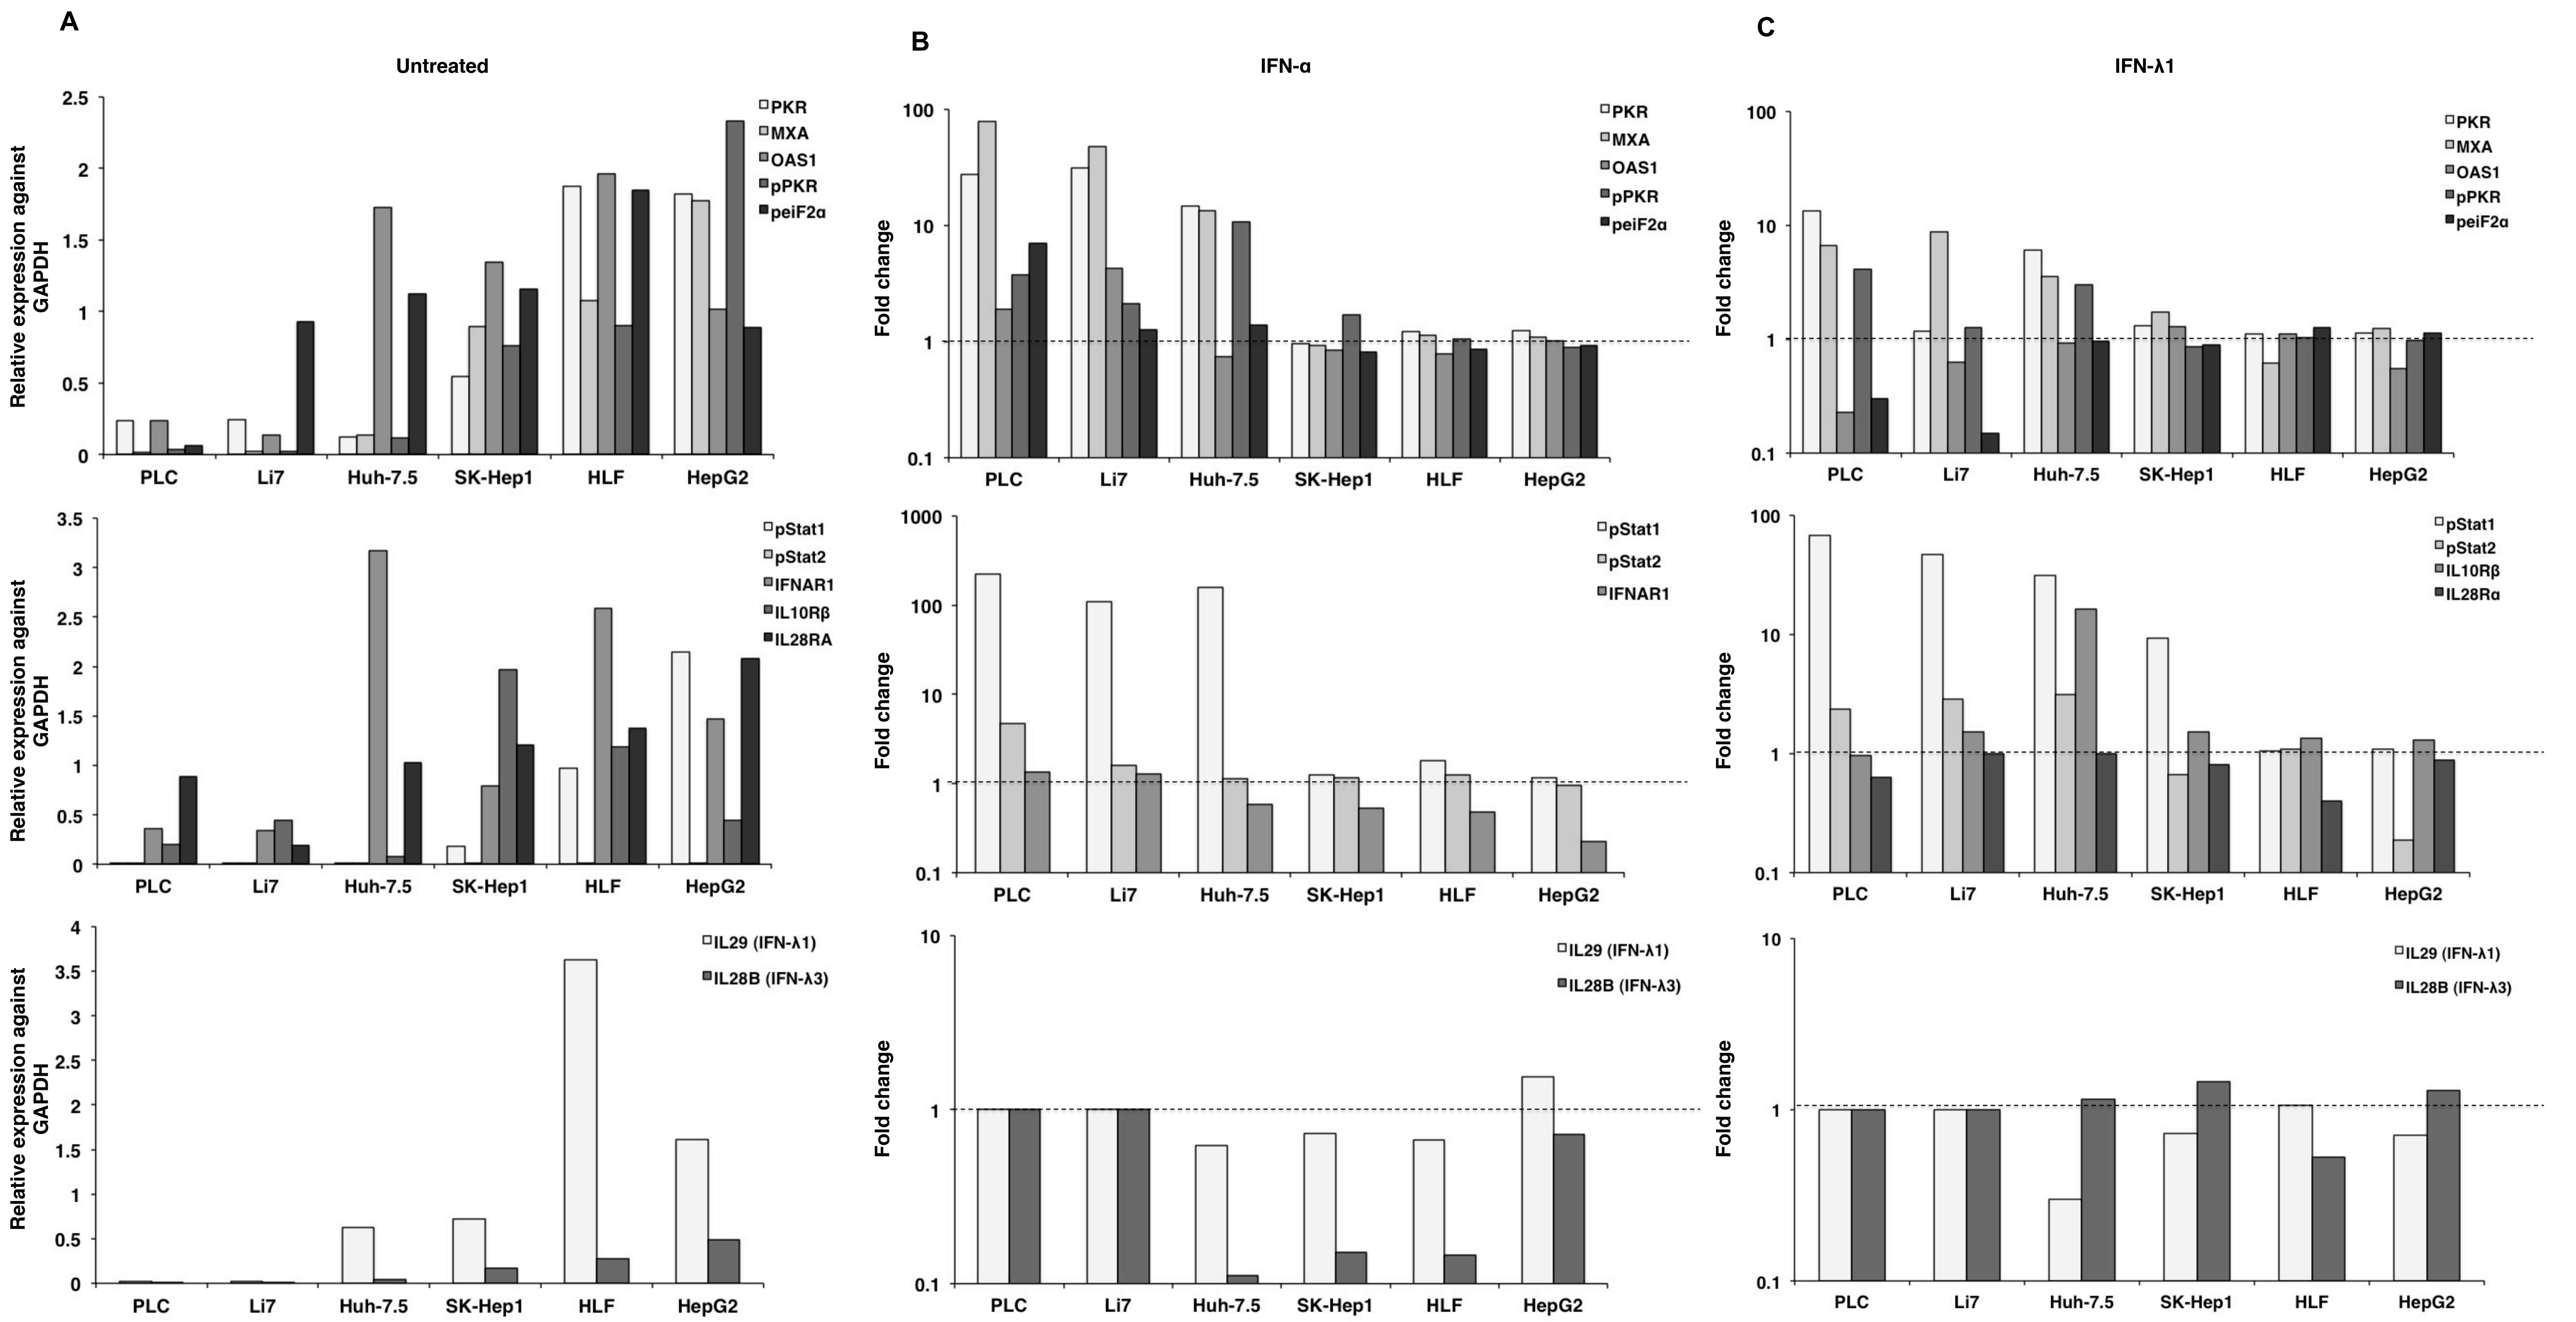

Supplement: mmc5.pdf [file mmc5.pdf]

**A**

**Kinetic of HCV infection in Huh7.5**

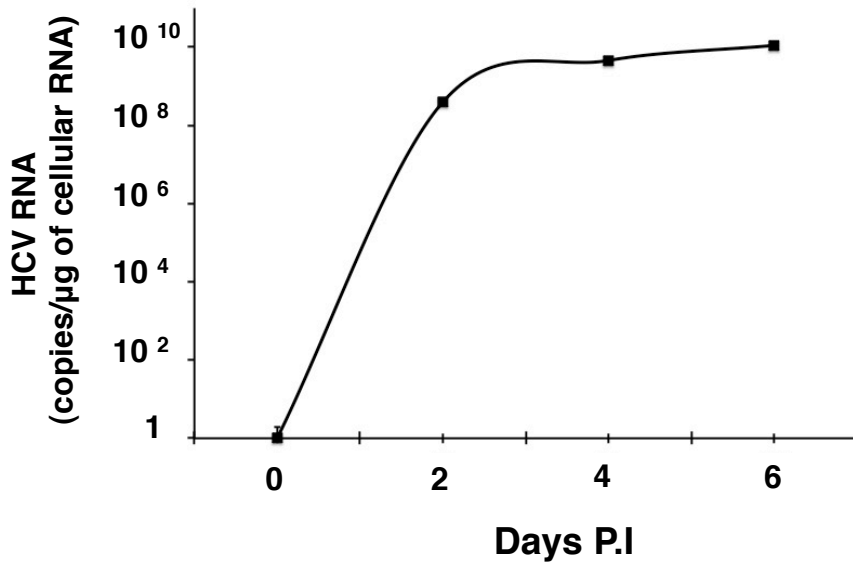

**B**

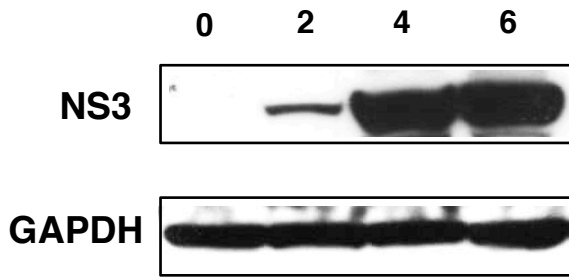

Supplement: mmc6.pdf [file mmc6.pdf]

Figure S7 : Ferraris et al., 2015

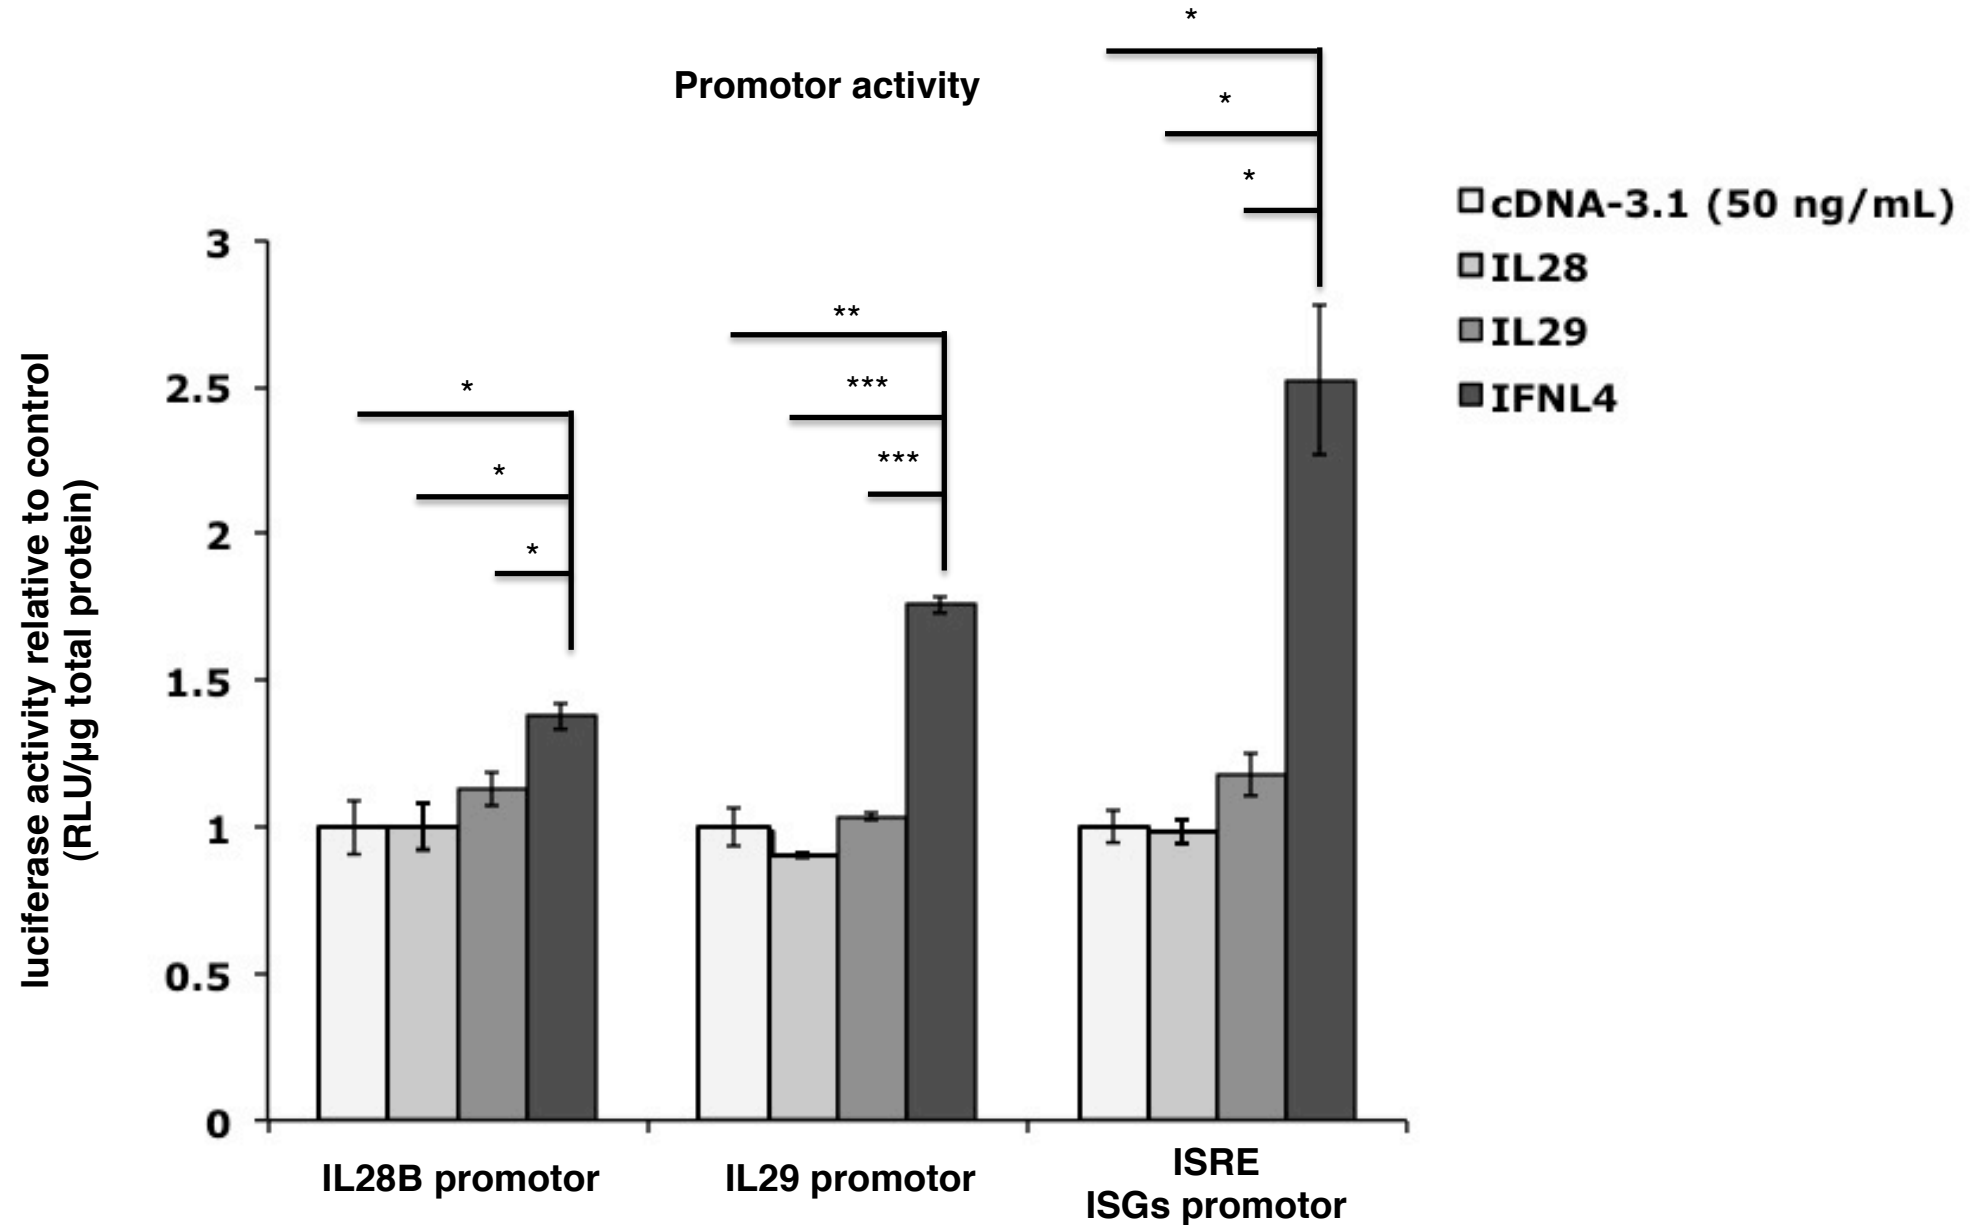

Supplement: mmc7.pdf [file mmc7.pdf]
